# Supplementary material
Source: PubMed Central journal article supplement (PMC11336136)

**A.** Down-regulated in single-perturbation compared to N2 EV

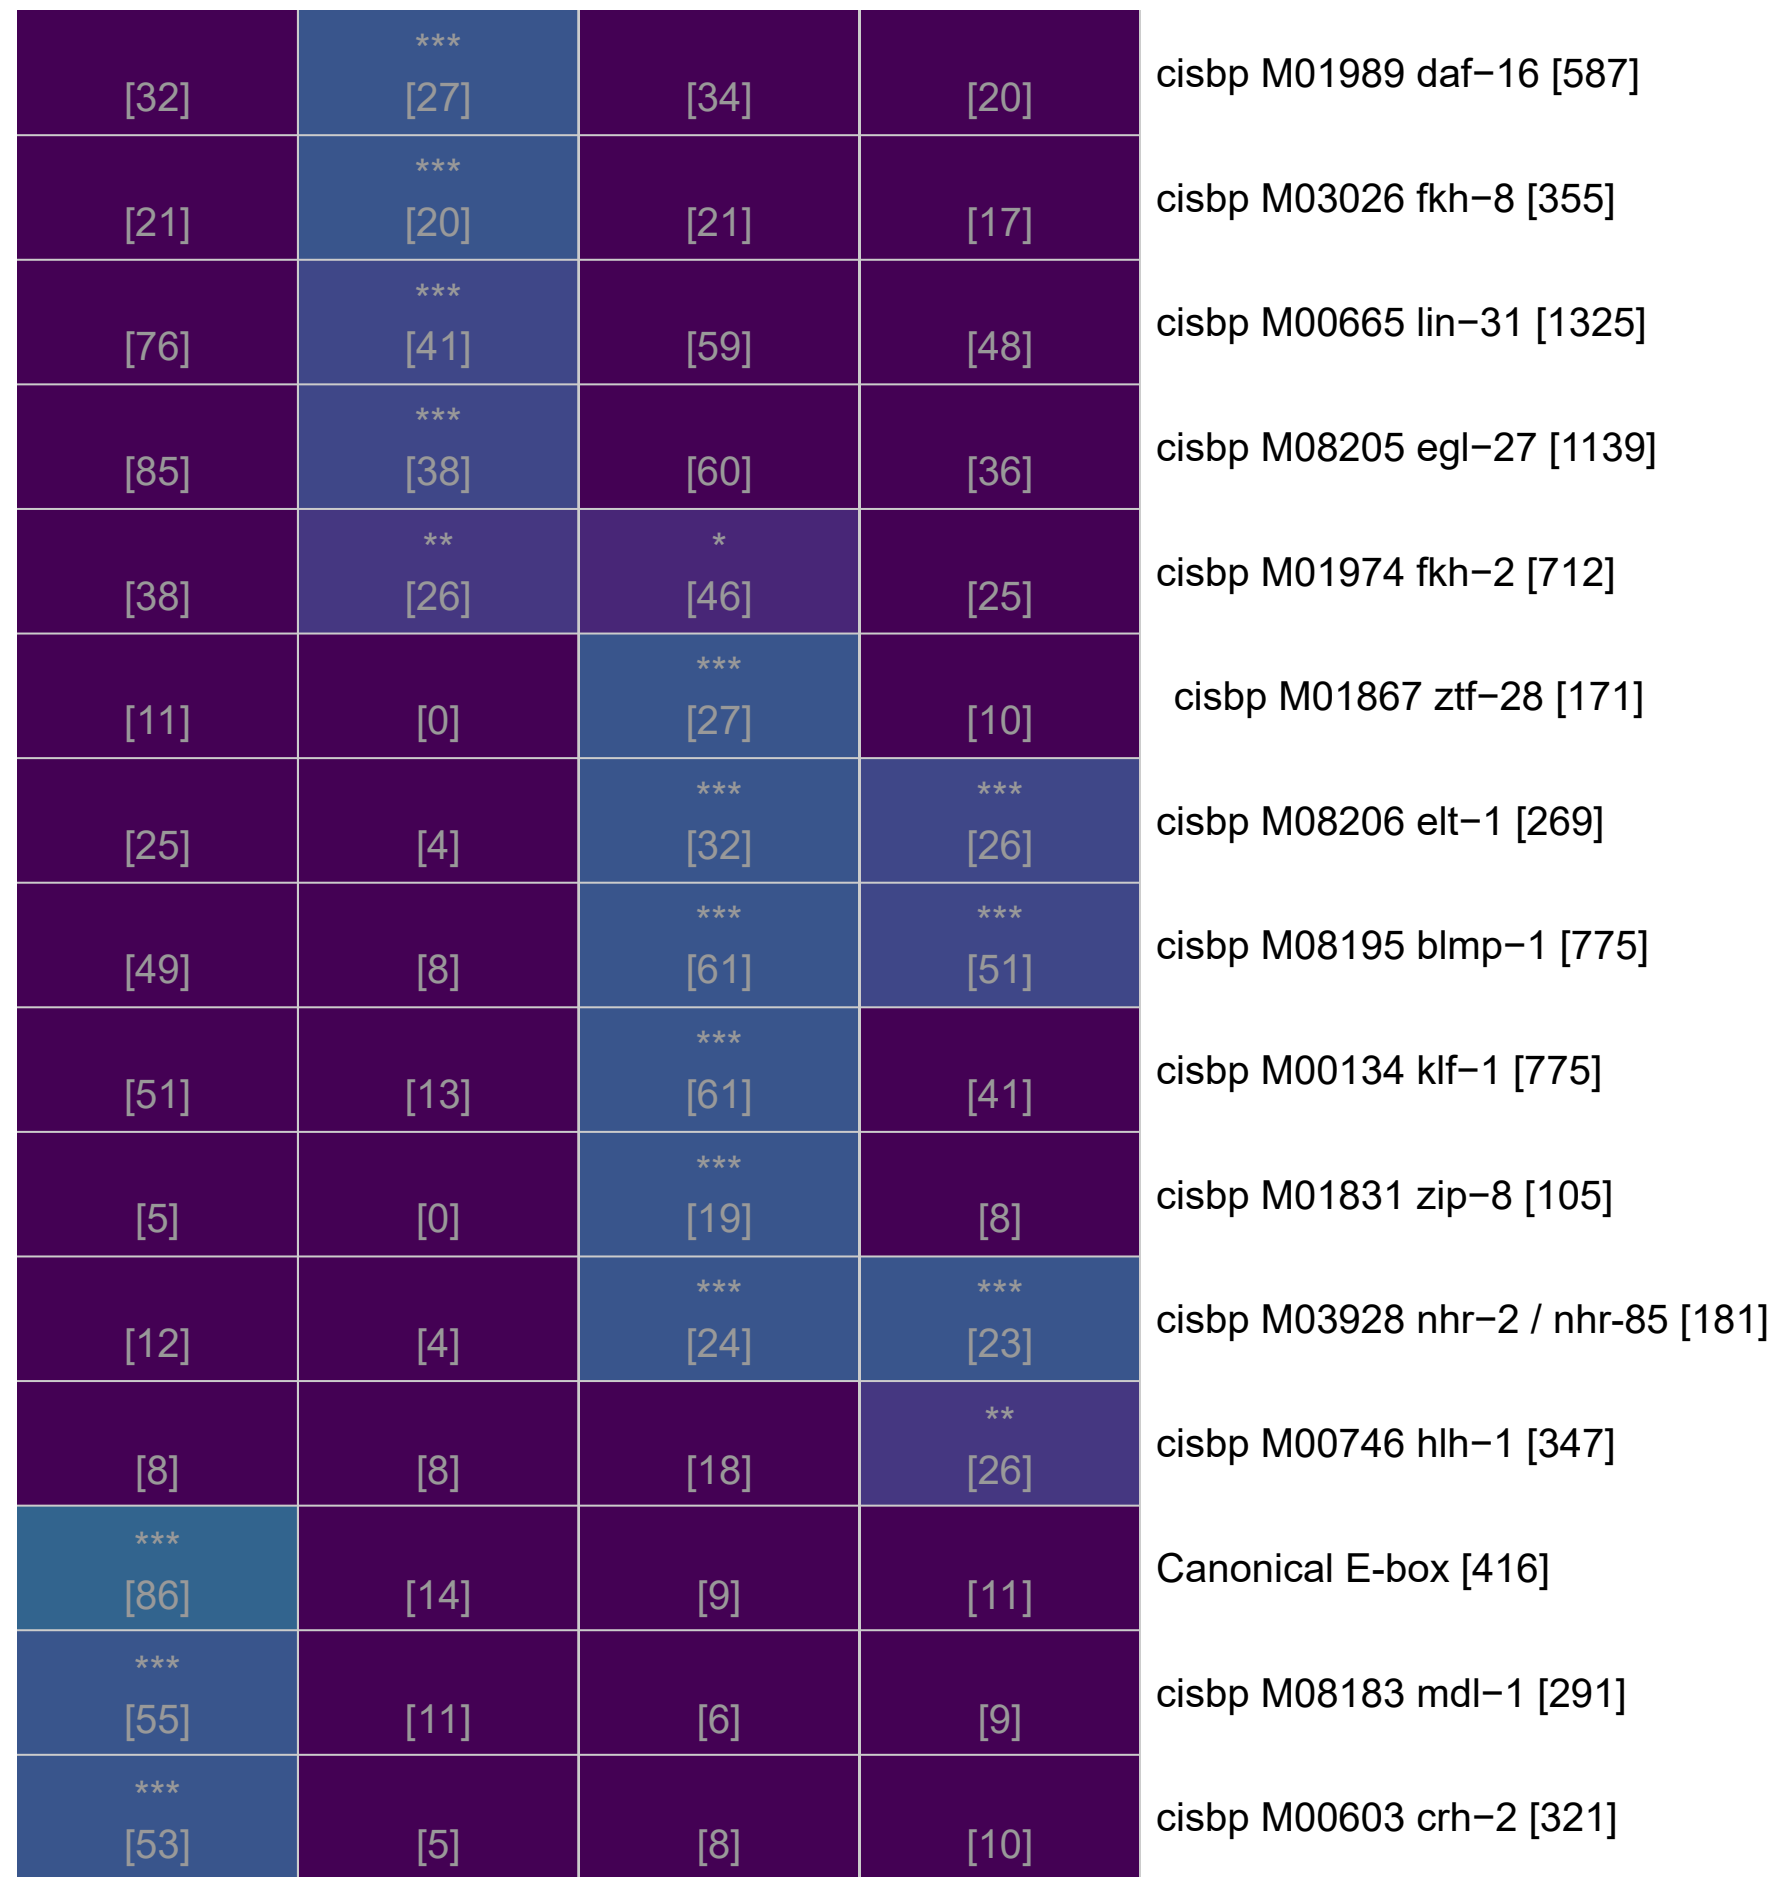

**B.** Up-regulated in single-perturbation compared to N2 EV

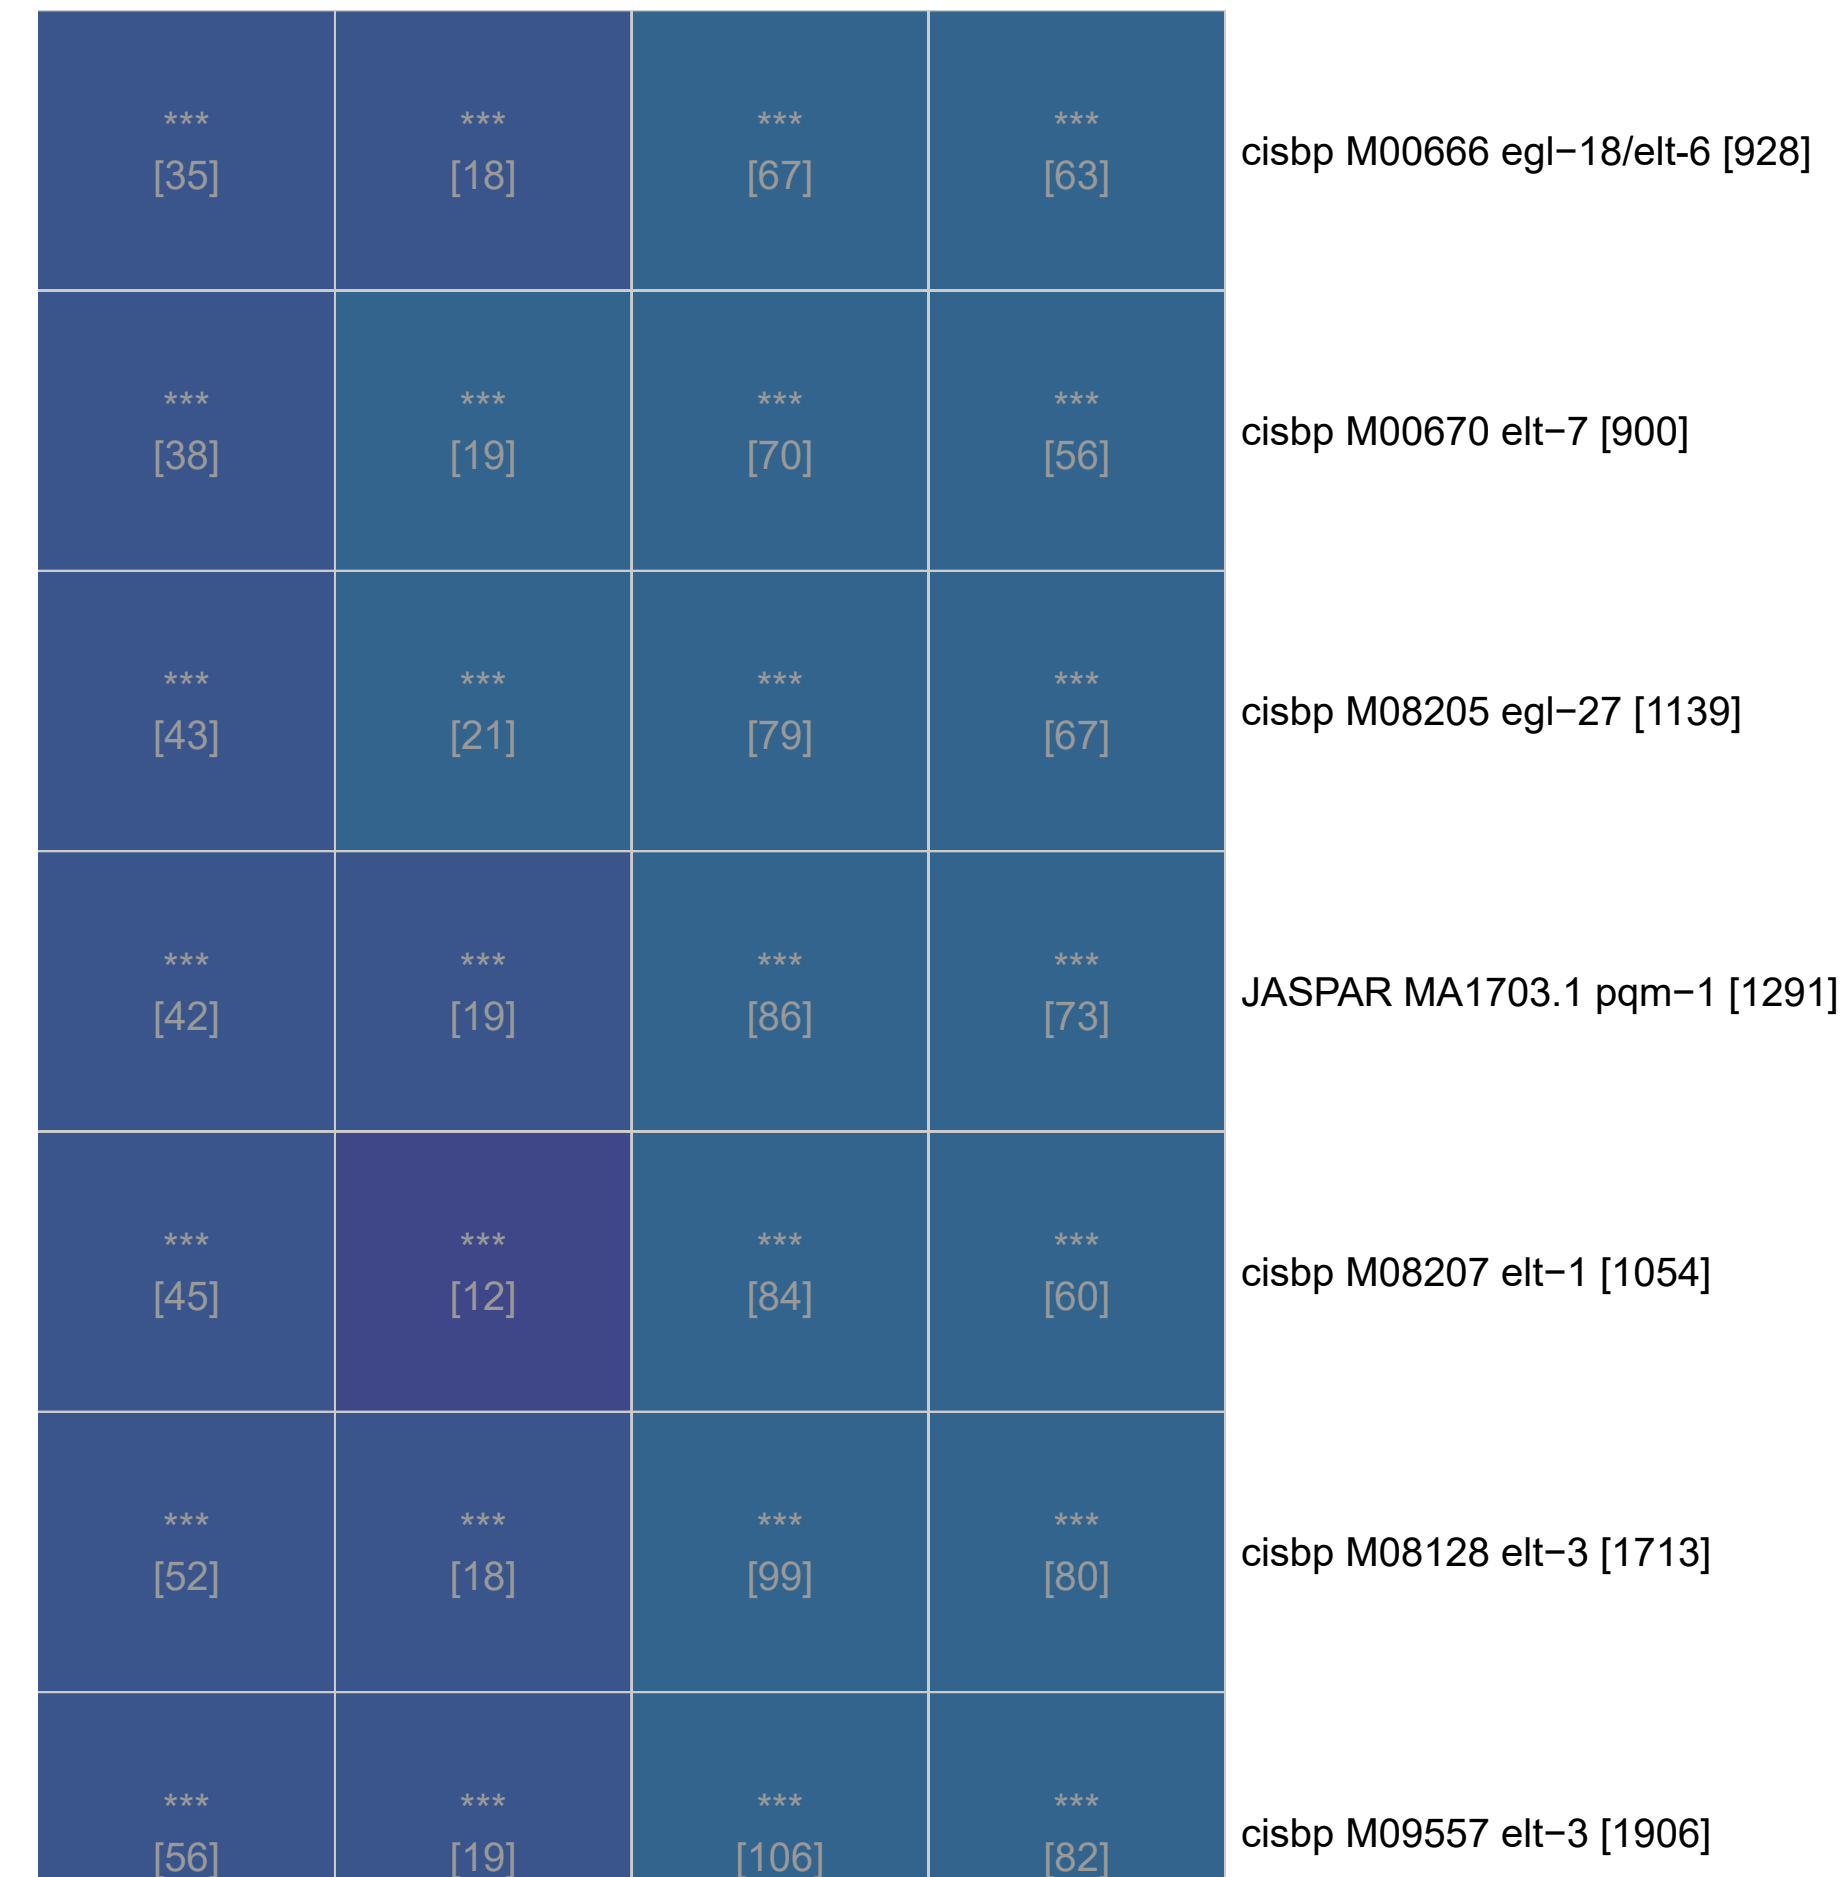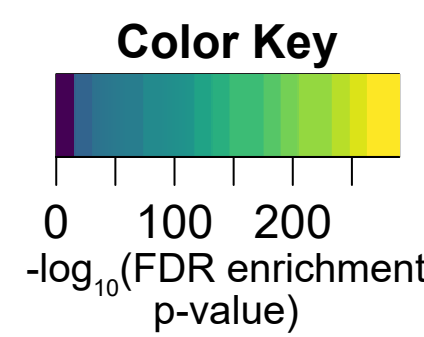

Supplement: 11357_2024_1197_MOESM8_ESM.pdf [file 11357_2024_1197_MOESM8_ESM.pdf]
