# Supplementary material
Source: PubMed Central journal article supplement (PMC11336136)

A.

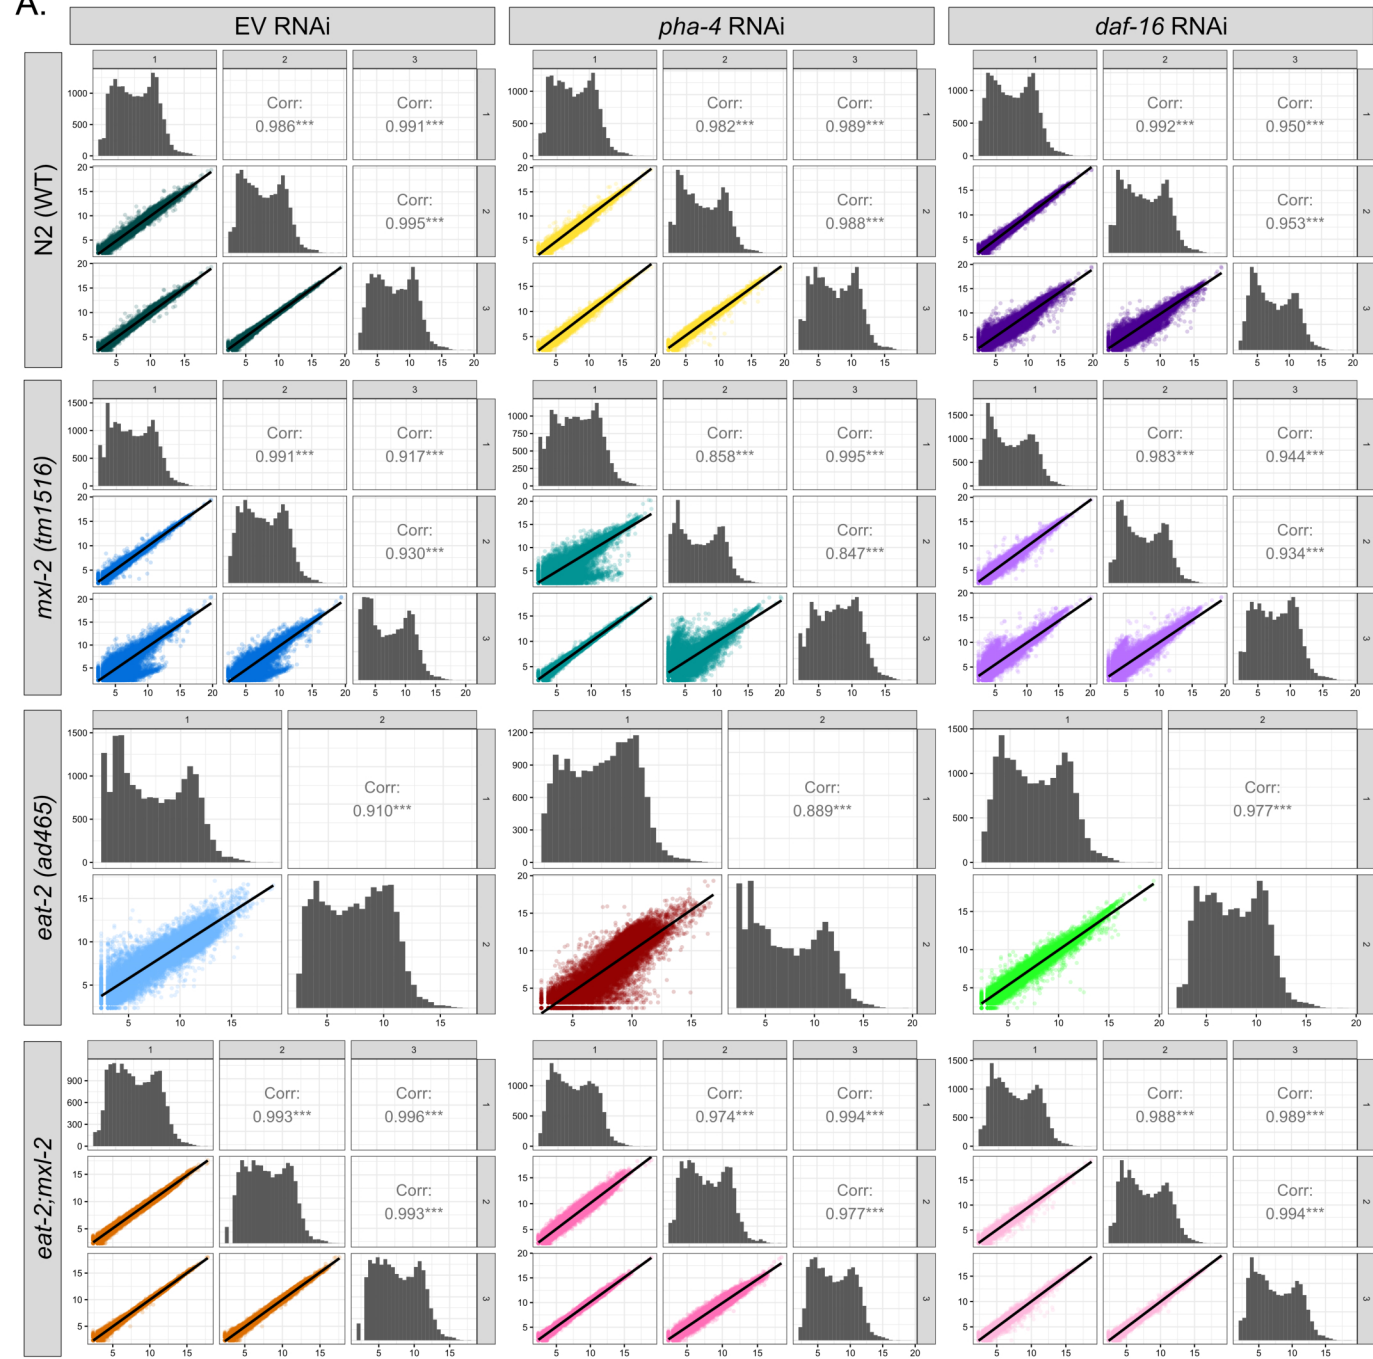

B.

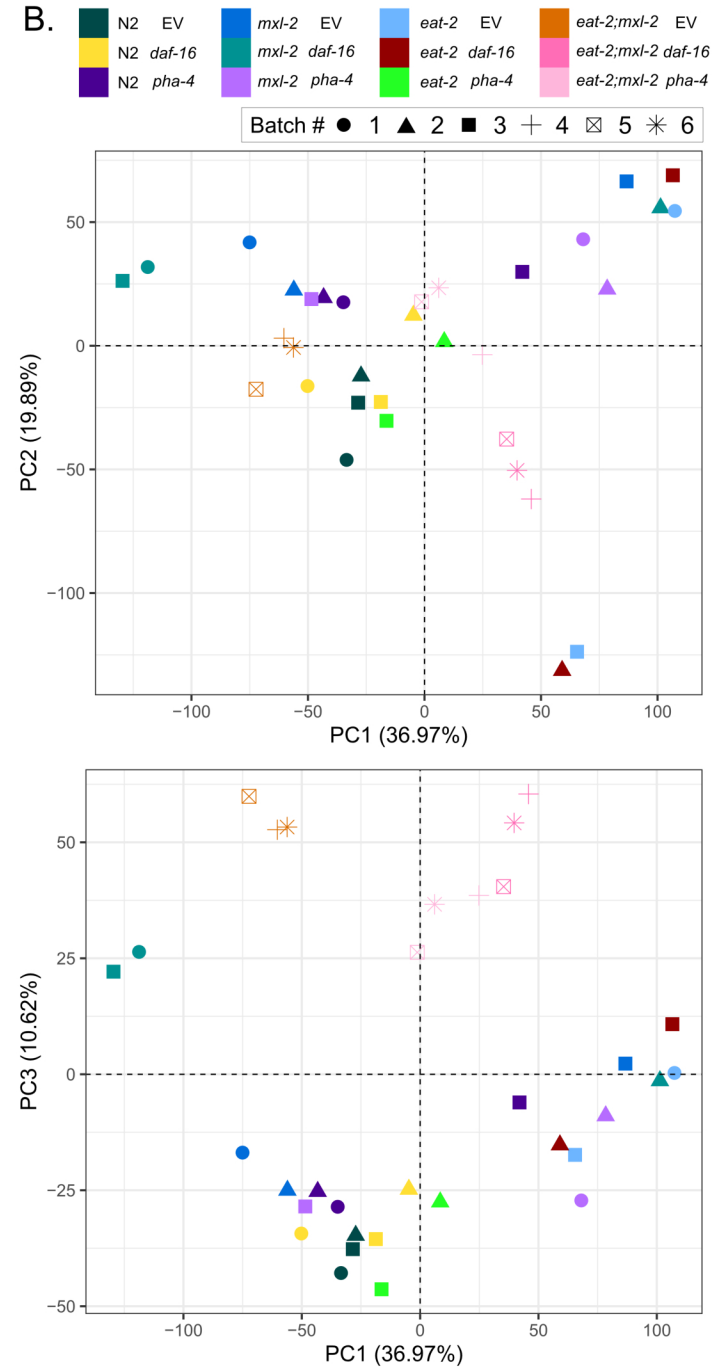

Supplement: 11357_2024_1197_MOESM1_ESM.pdf [file 11357_2024_1197_MOESM1_ESM.pdf]

A.

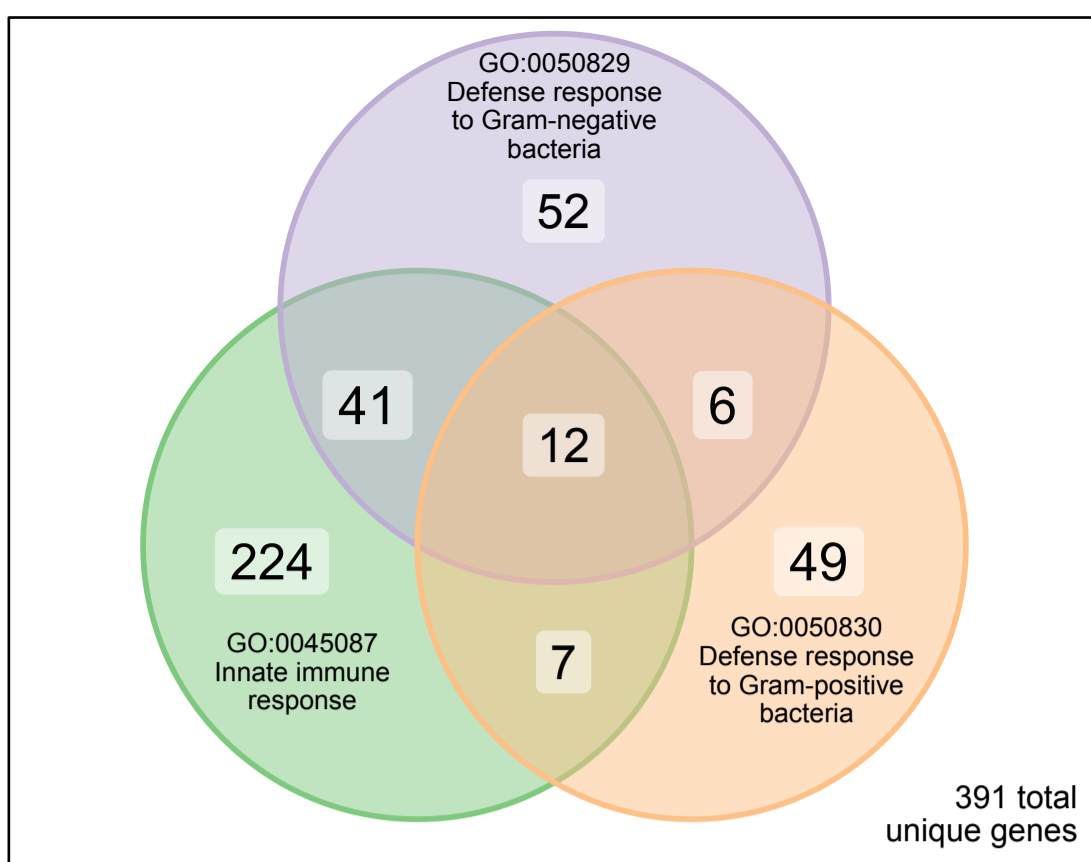

B.

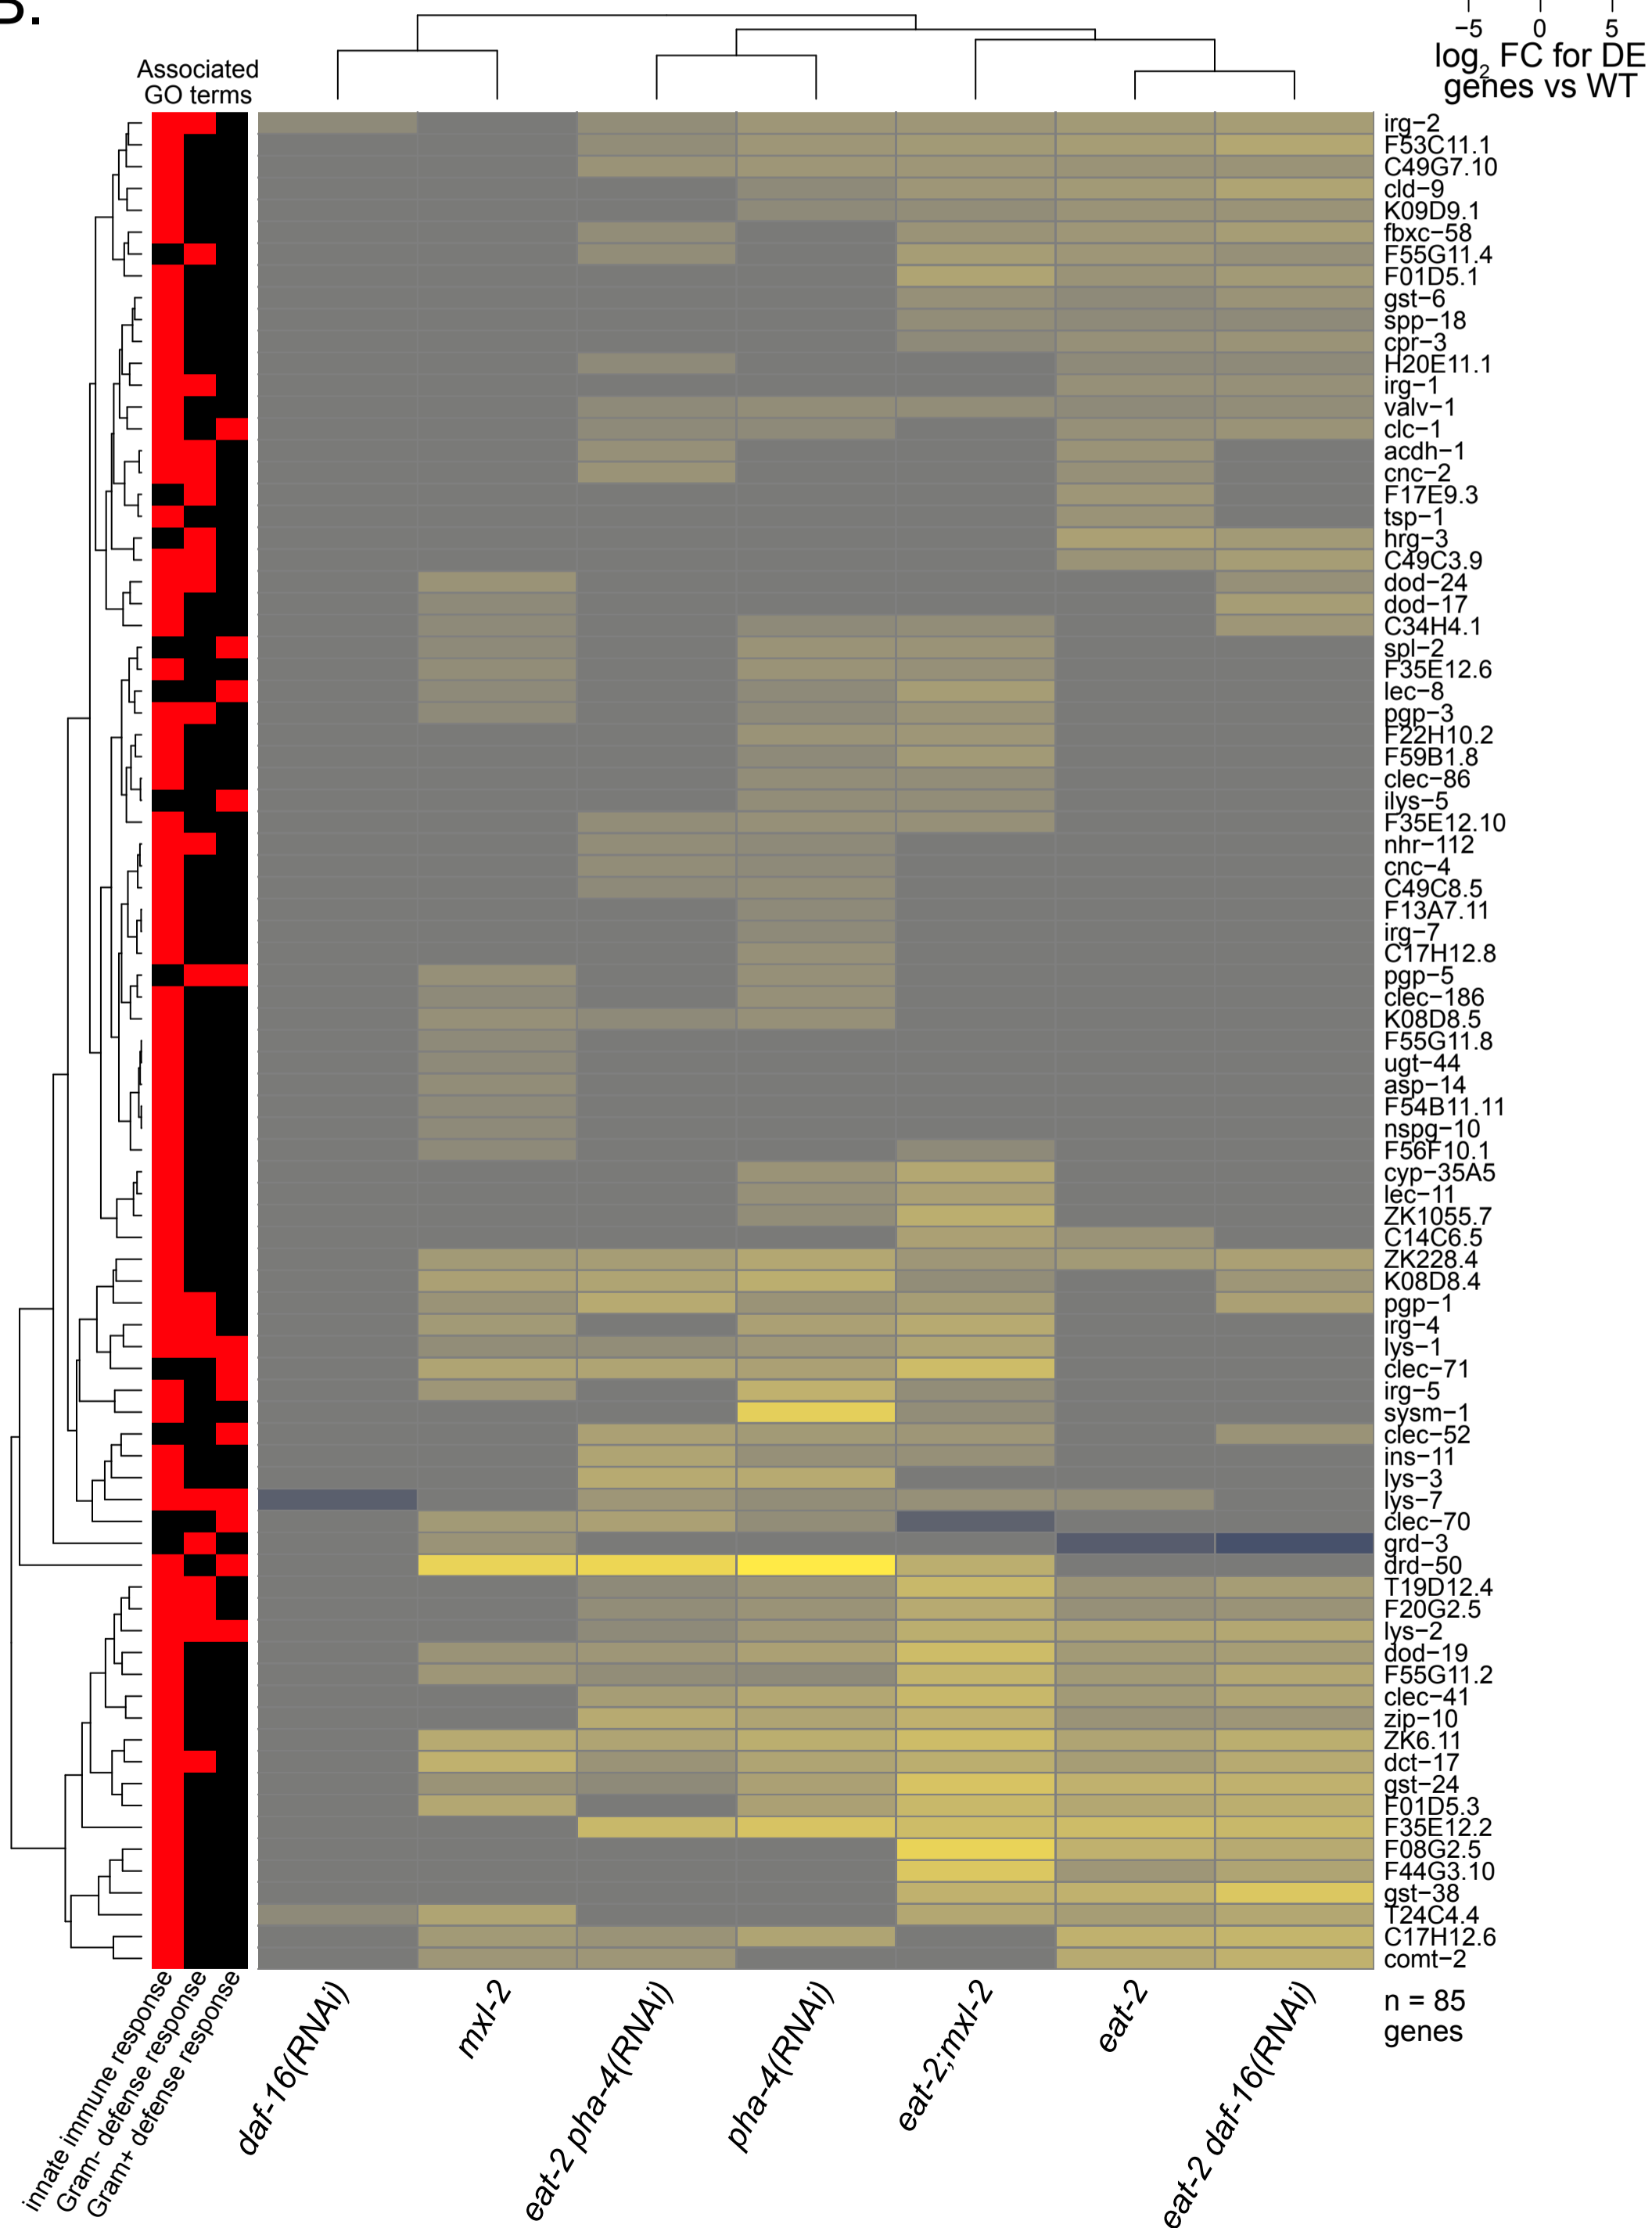

Supplement: 11357_2024_1197_MOESM2_ESM.pdf [file 11357_2024_1197_MOESM2_ESM.pdf]

GO: Biological Process
  GO: Molecular Function
  KEGG Pathways

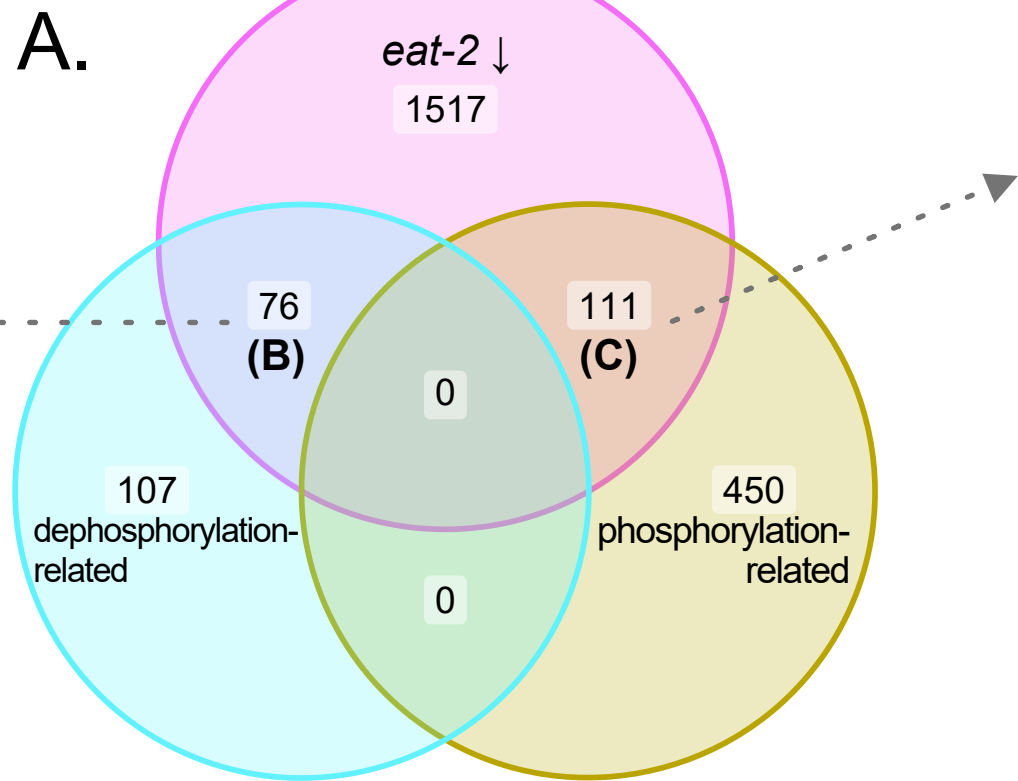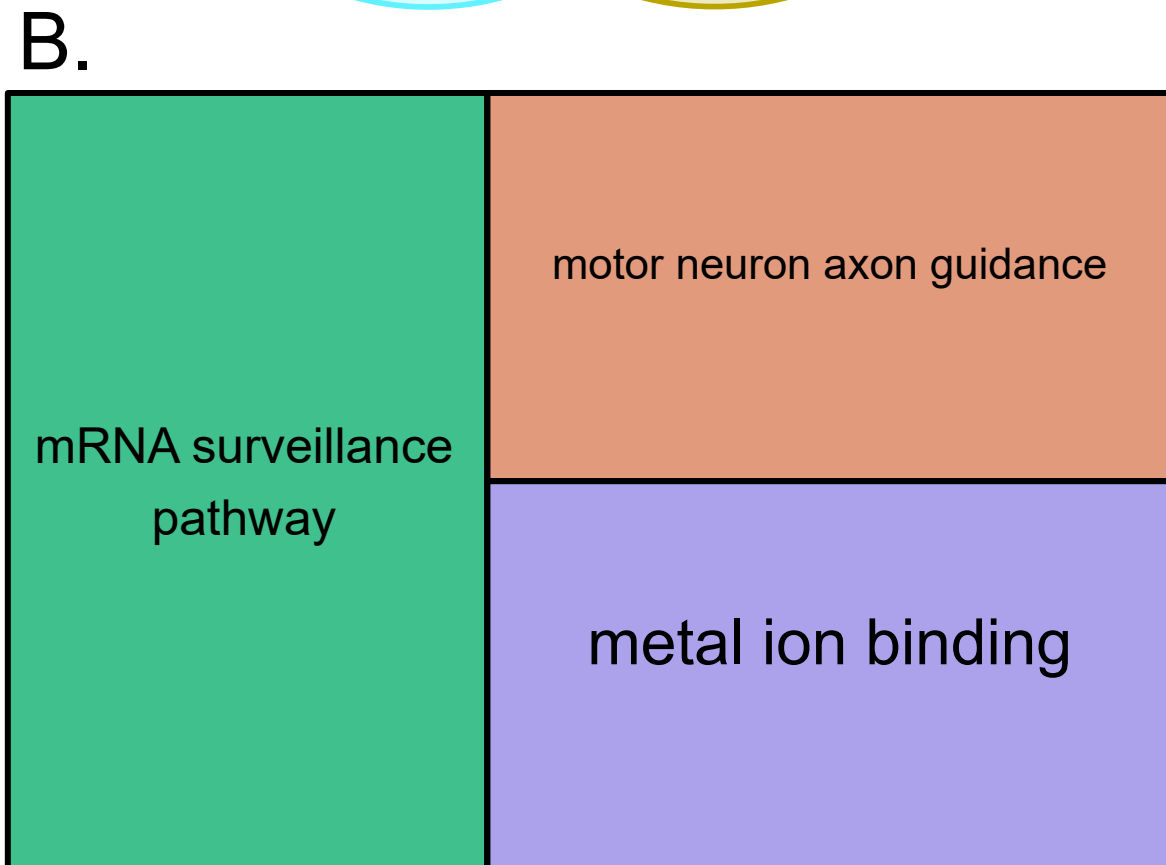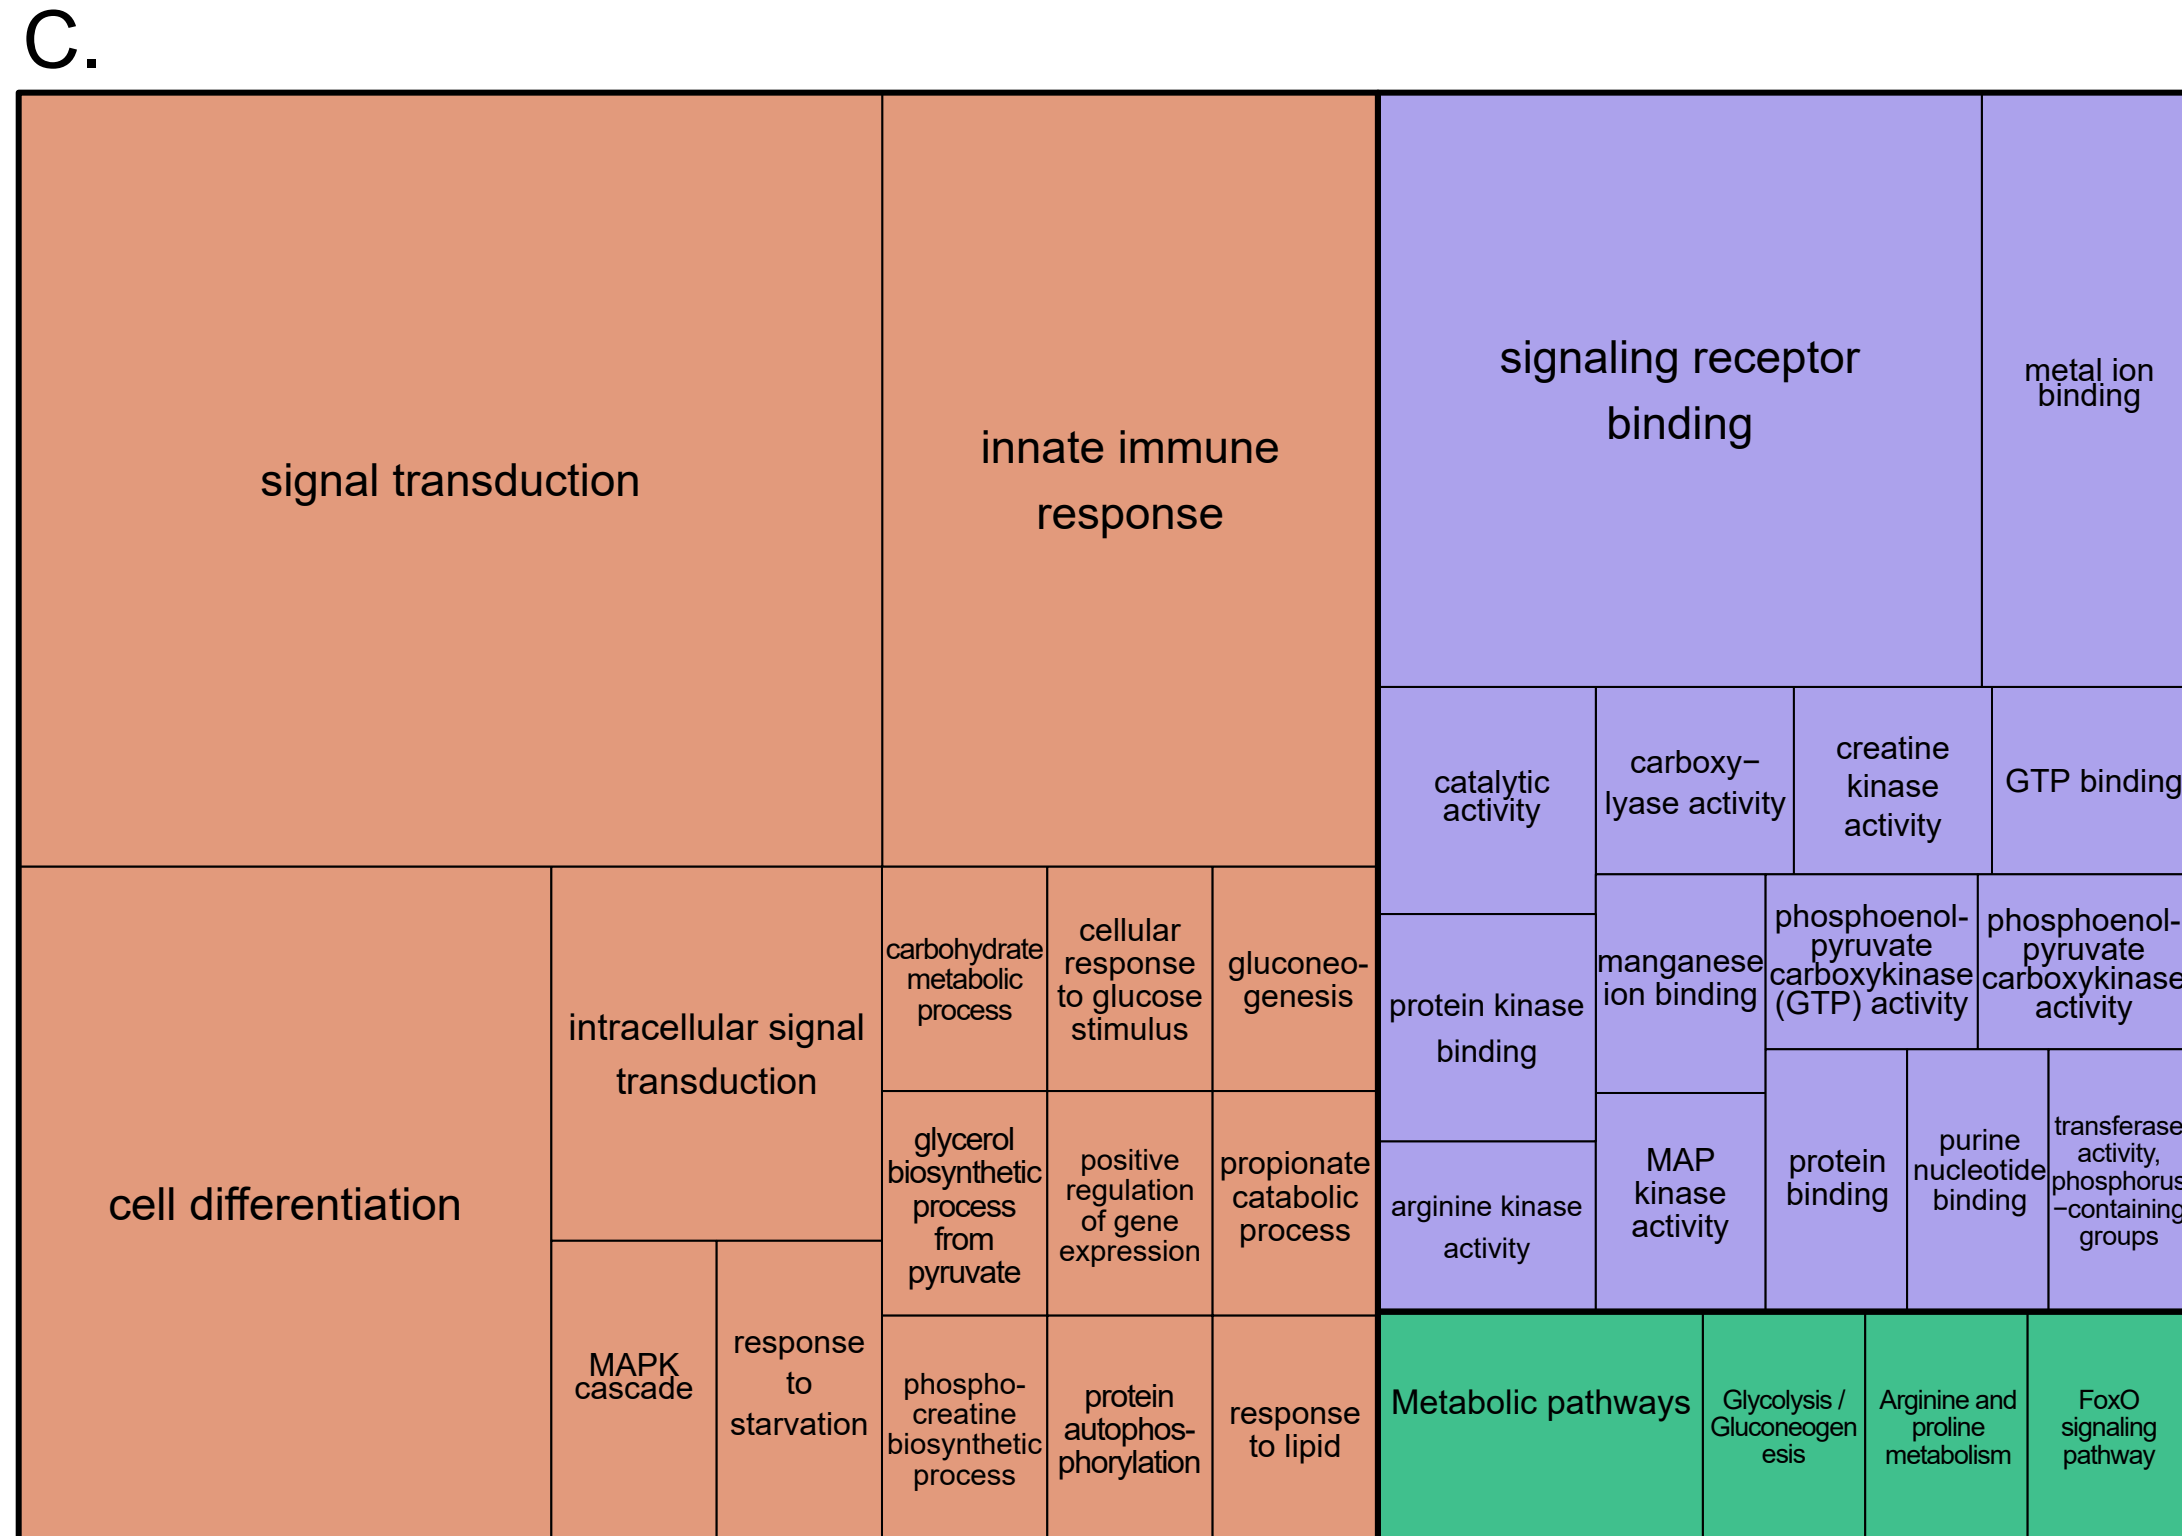

Supplement: 11357_2024_1197_MOESM3_ESM.pdf [file 11357_2024_1197_MOESM3_ESM.pdf]

A.

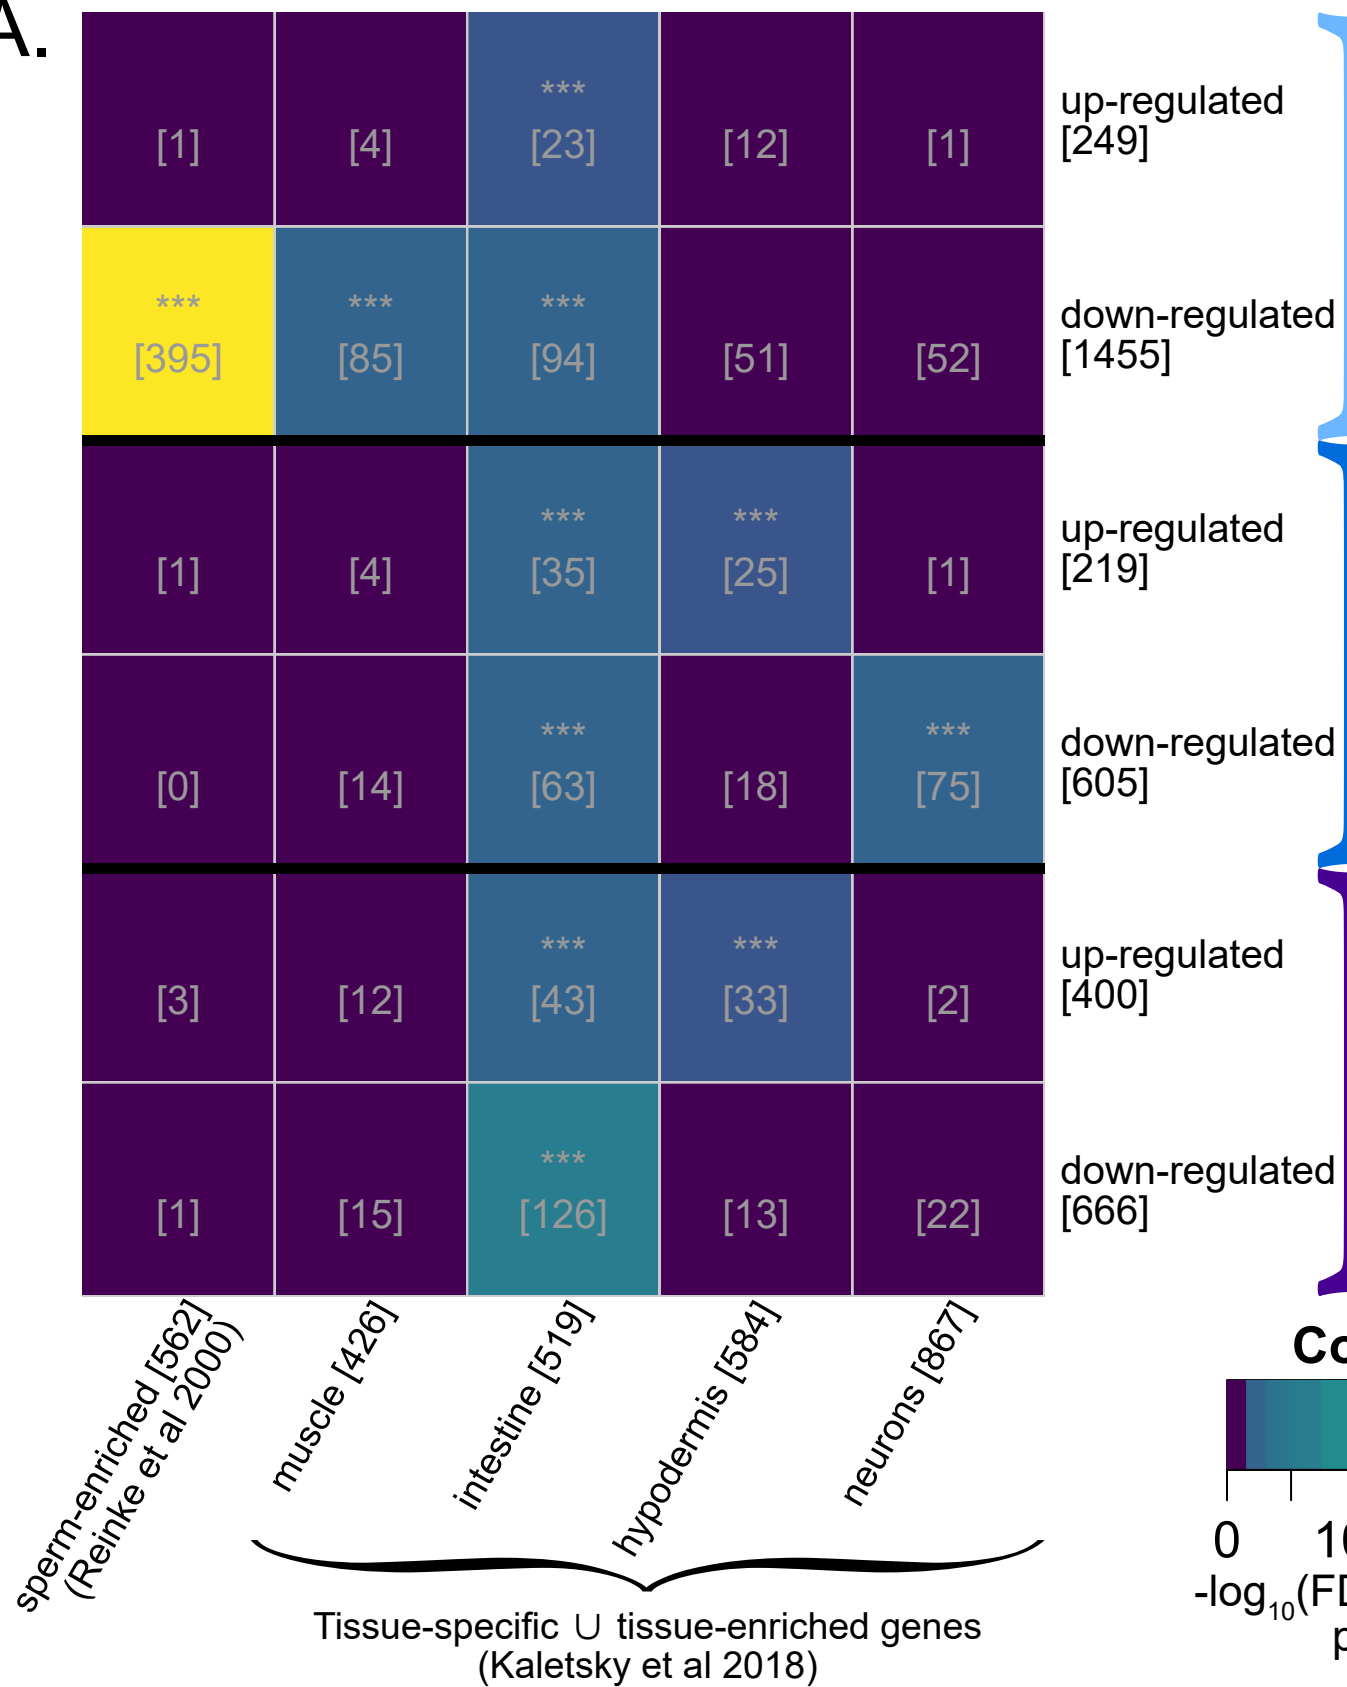*eat-2* vs WT*mxl-2* vs WT*pha-4(RNAi)* vs WT

B.

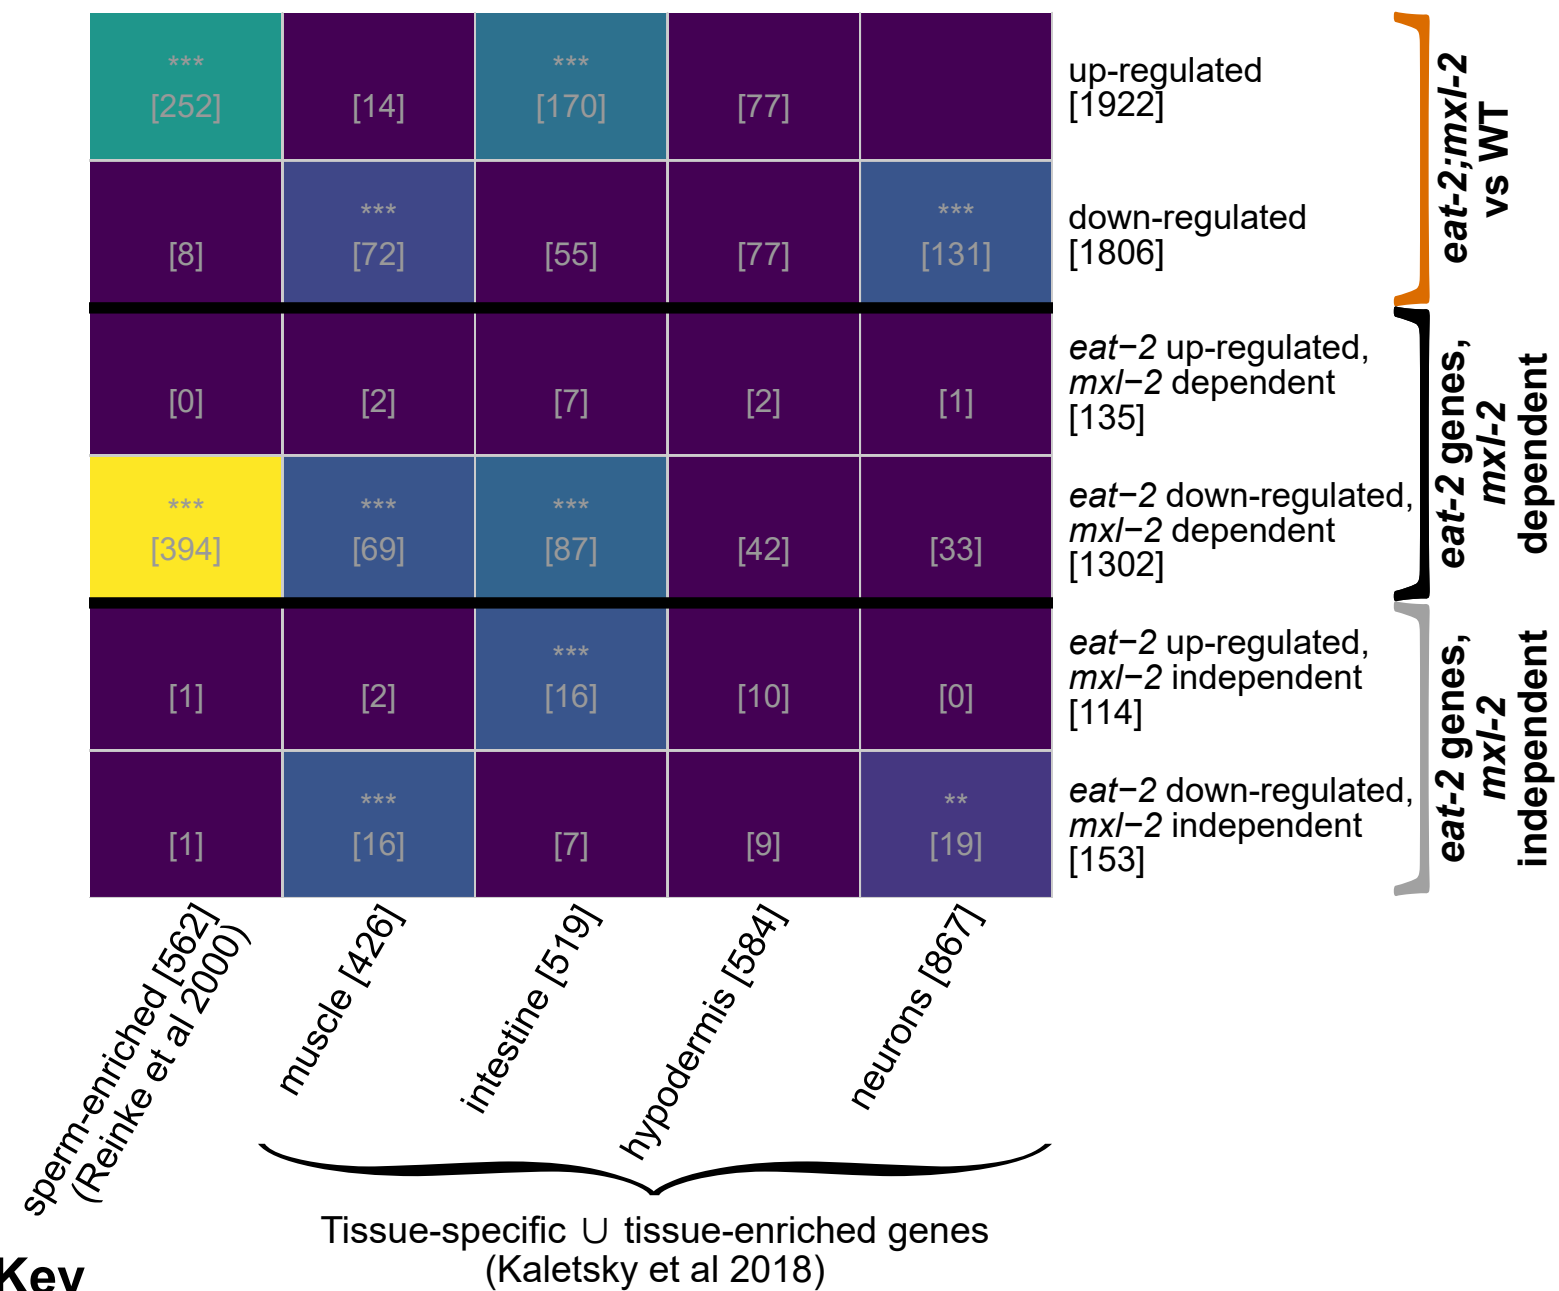

Color Key

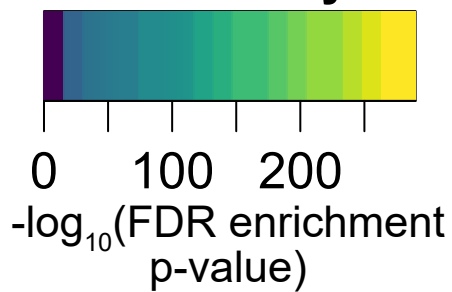

Supplement: 11357_2024_1197_MOESM4_ESM.pdf [file 11357_2024_1197_MOESM4_ESM.pdf]

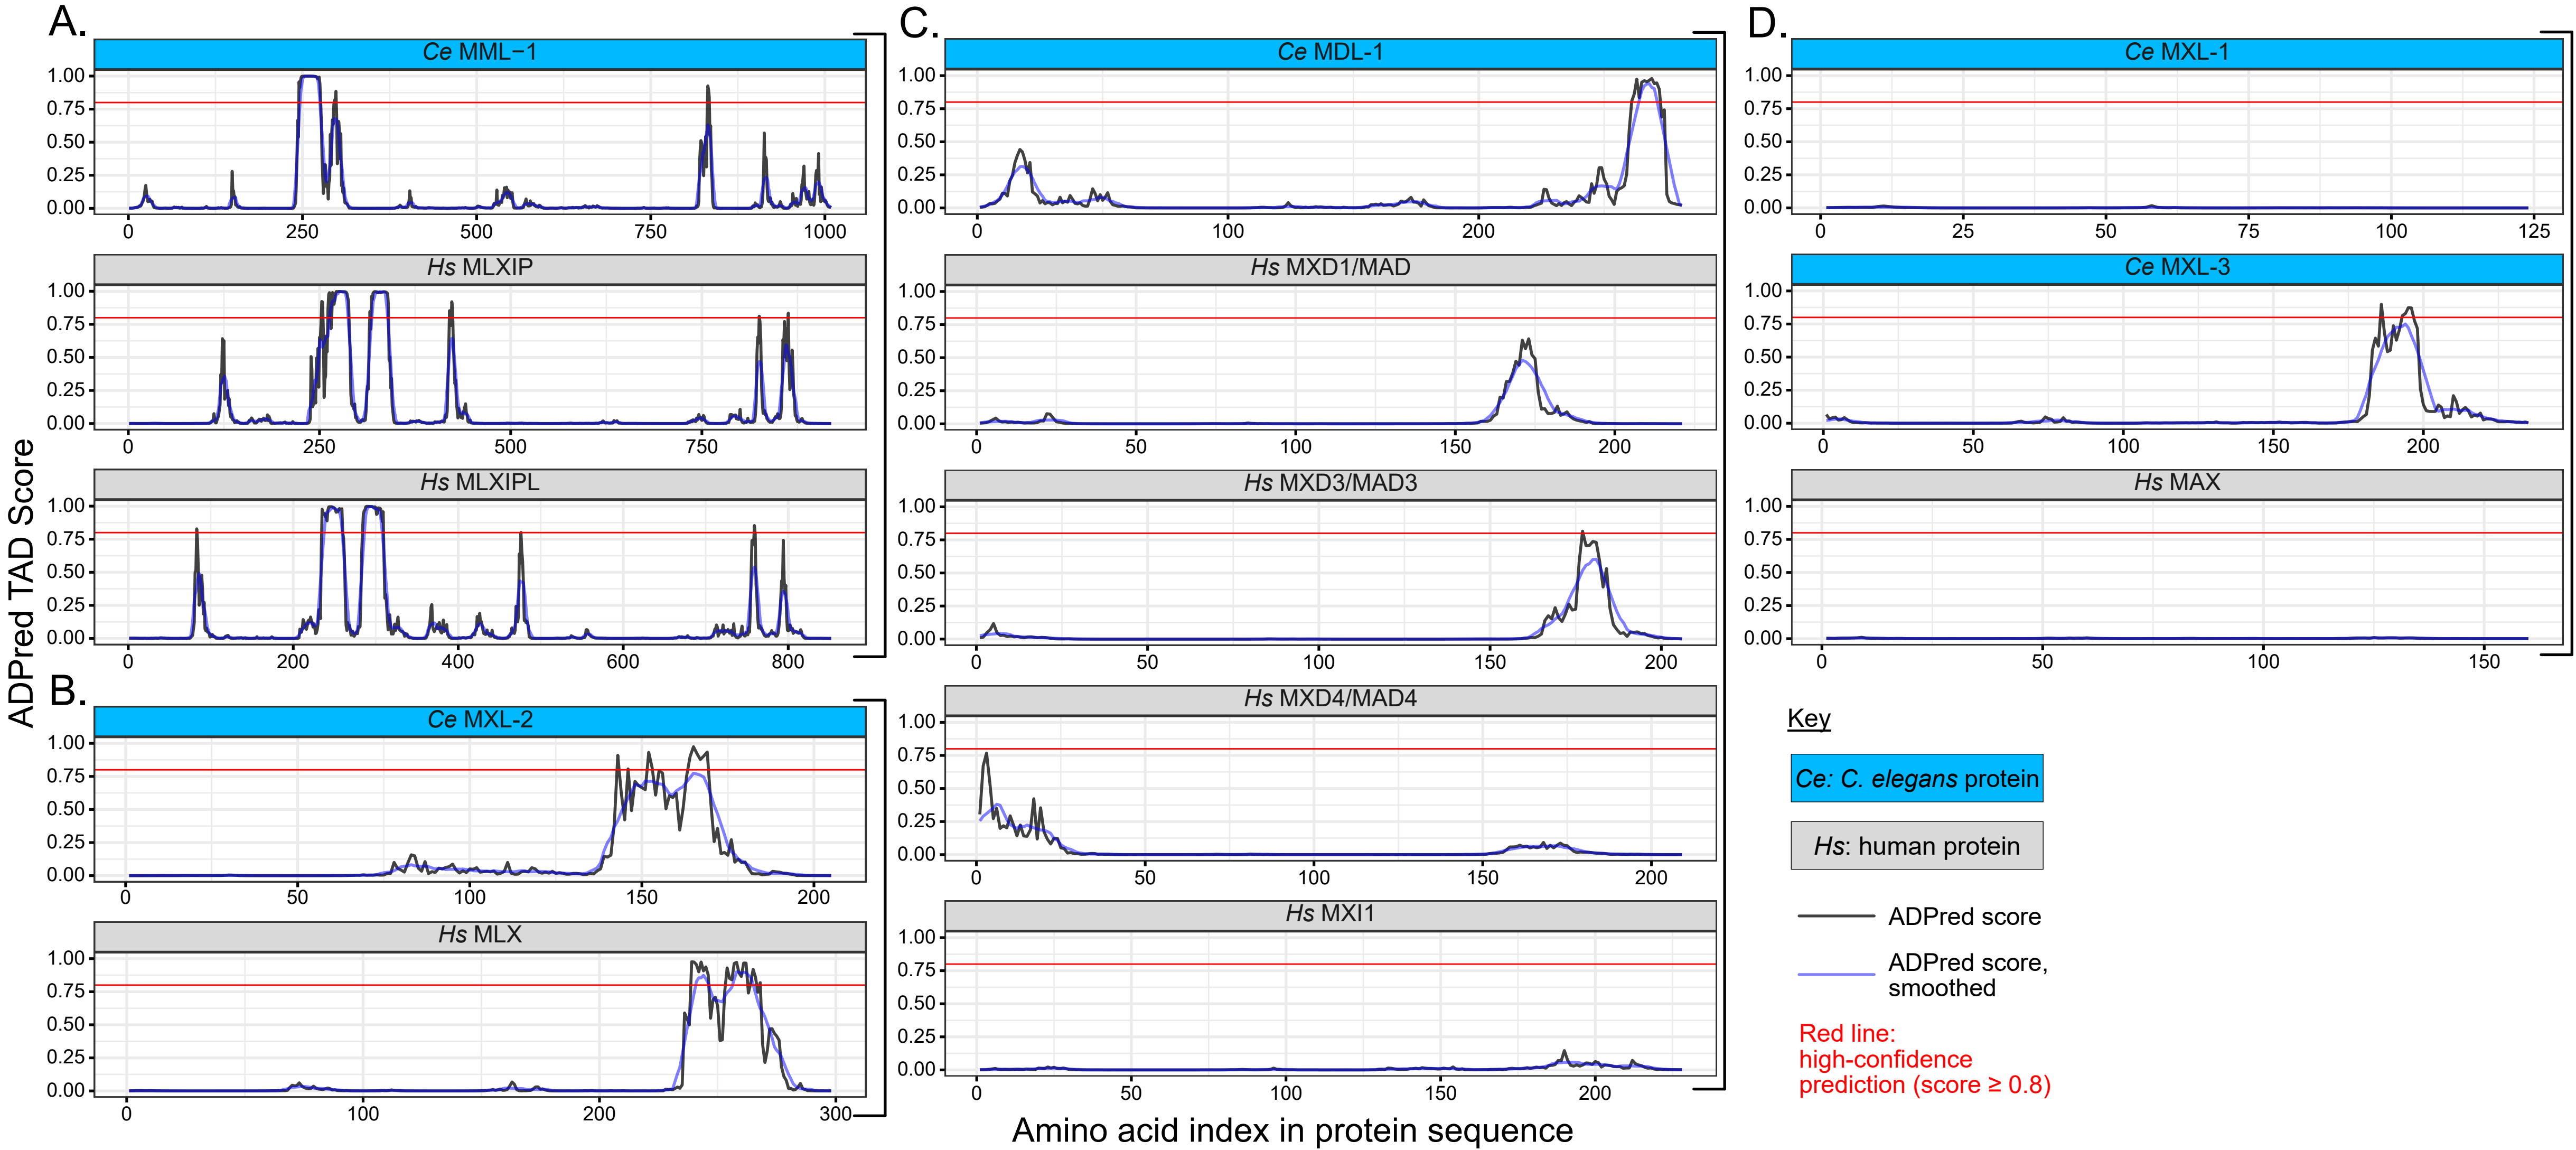

Supplement: 11357_2024_1197_MOESM5_ESM.pdf [file 11357_2024_1197_MOESM5_ESM.pdf]

**A.**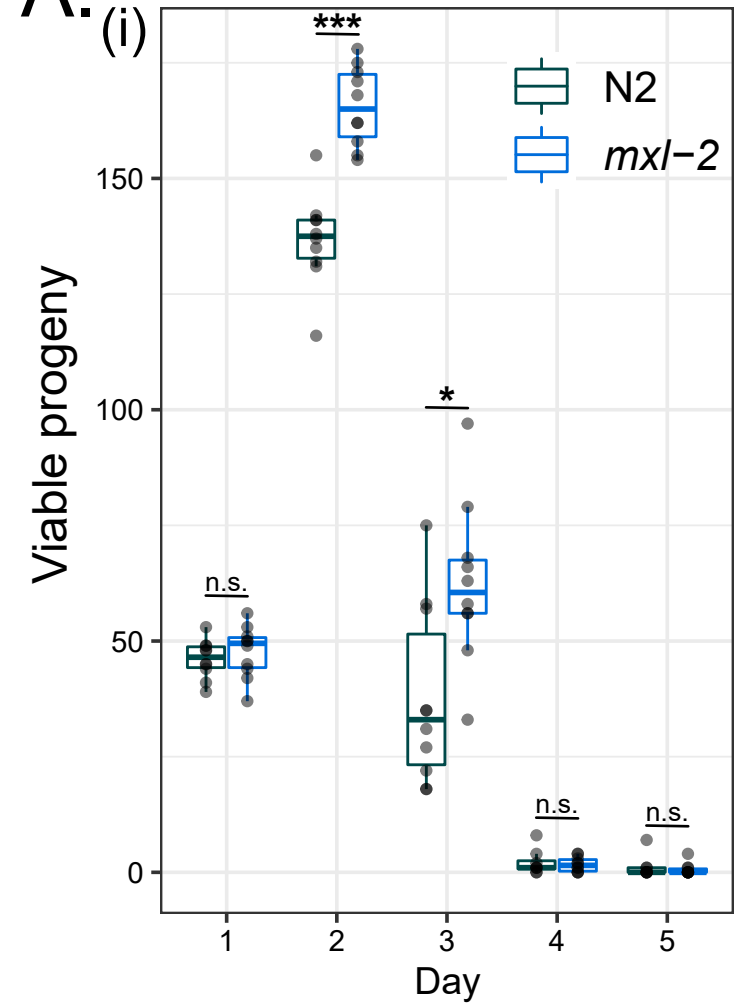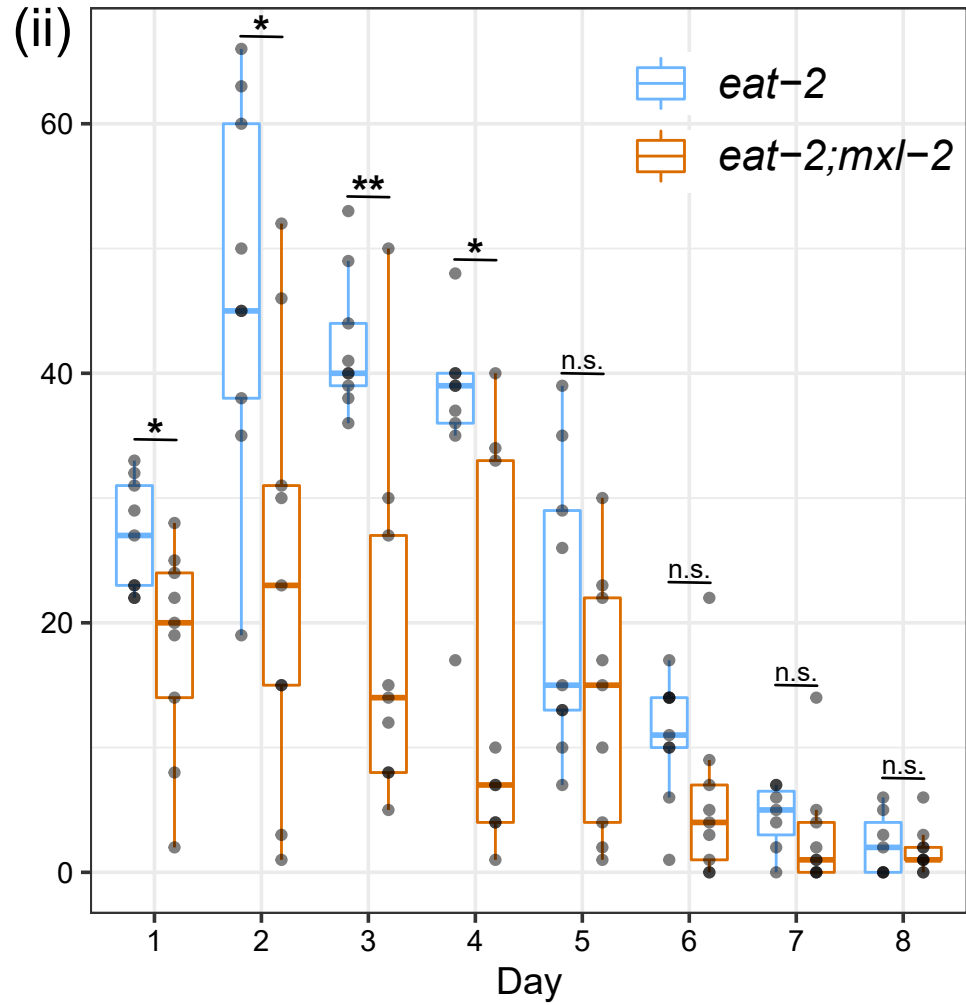**B.**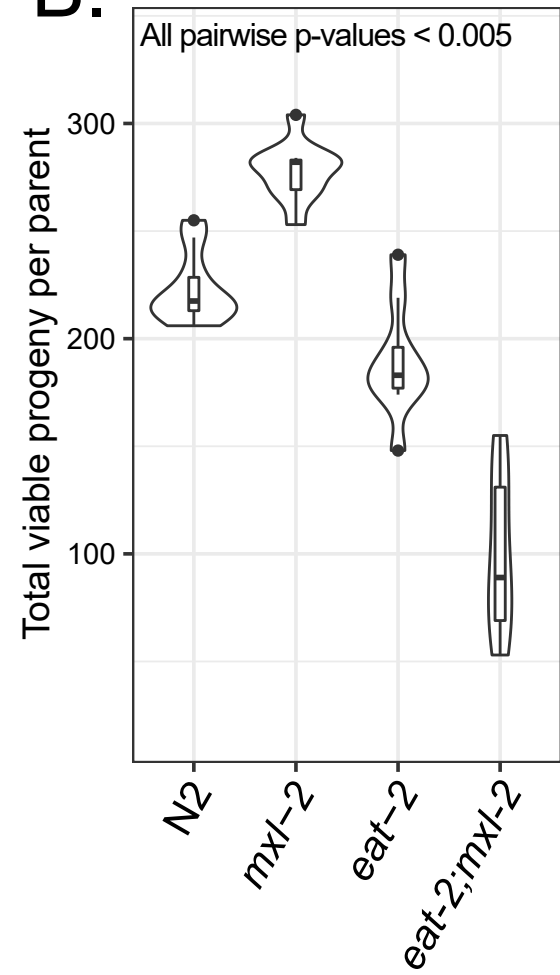**C.**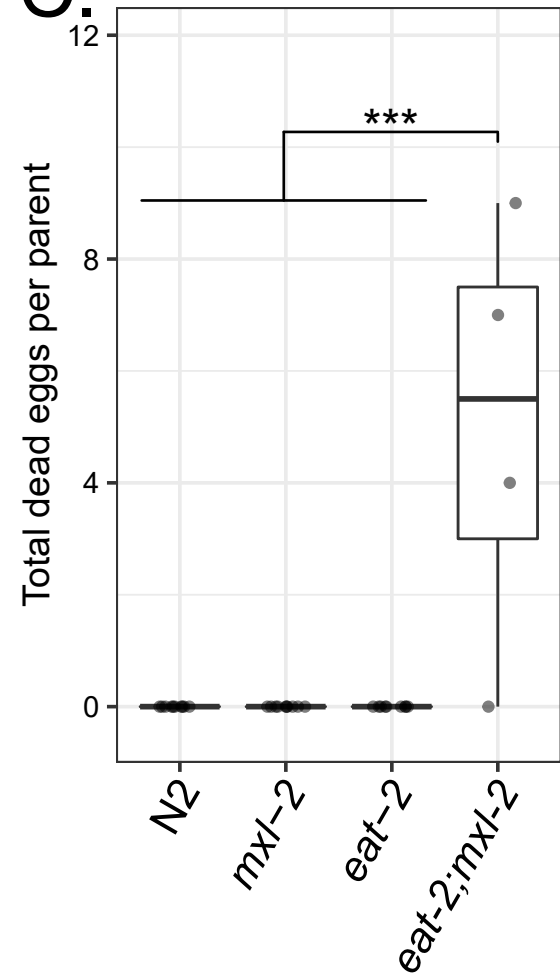

Supplement: 11357_2024_1197_MOESM6_ESM.pdf [file 11357_2024_1197_MOESM6_ESM.pdf]

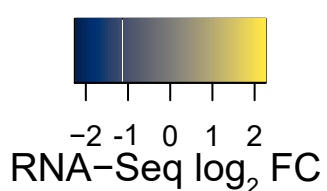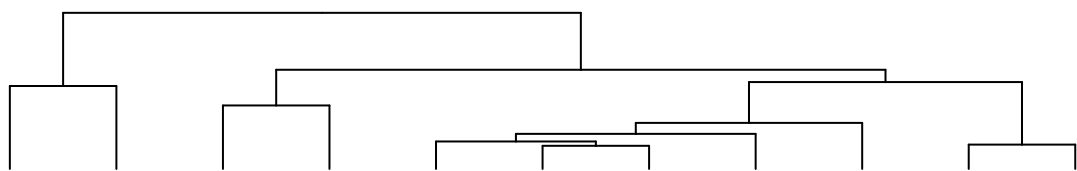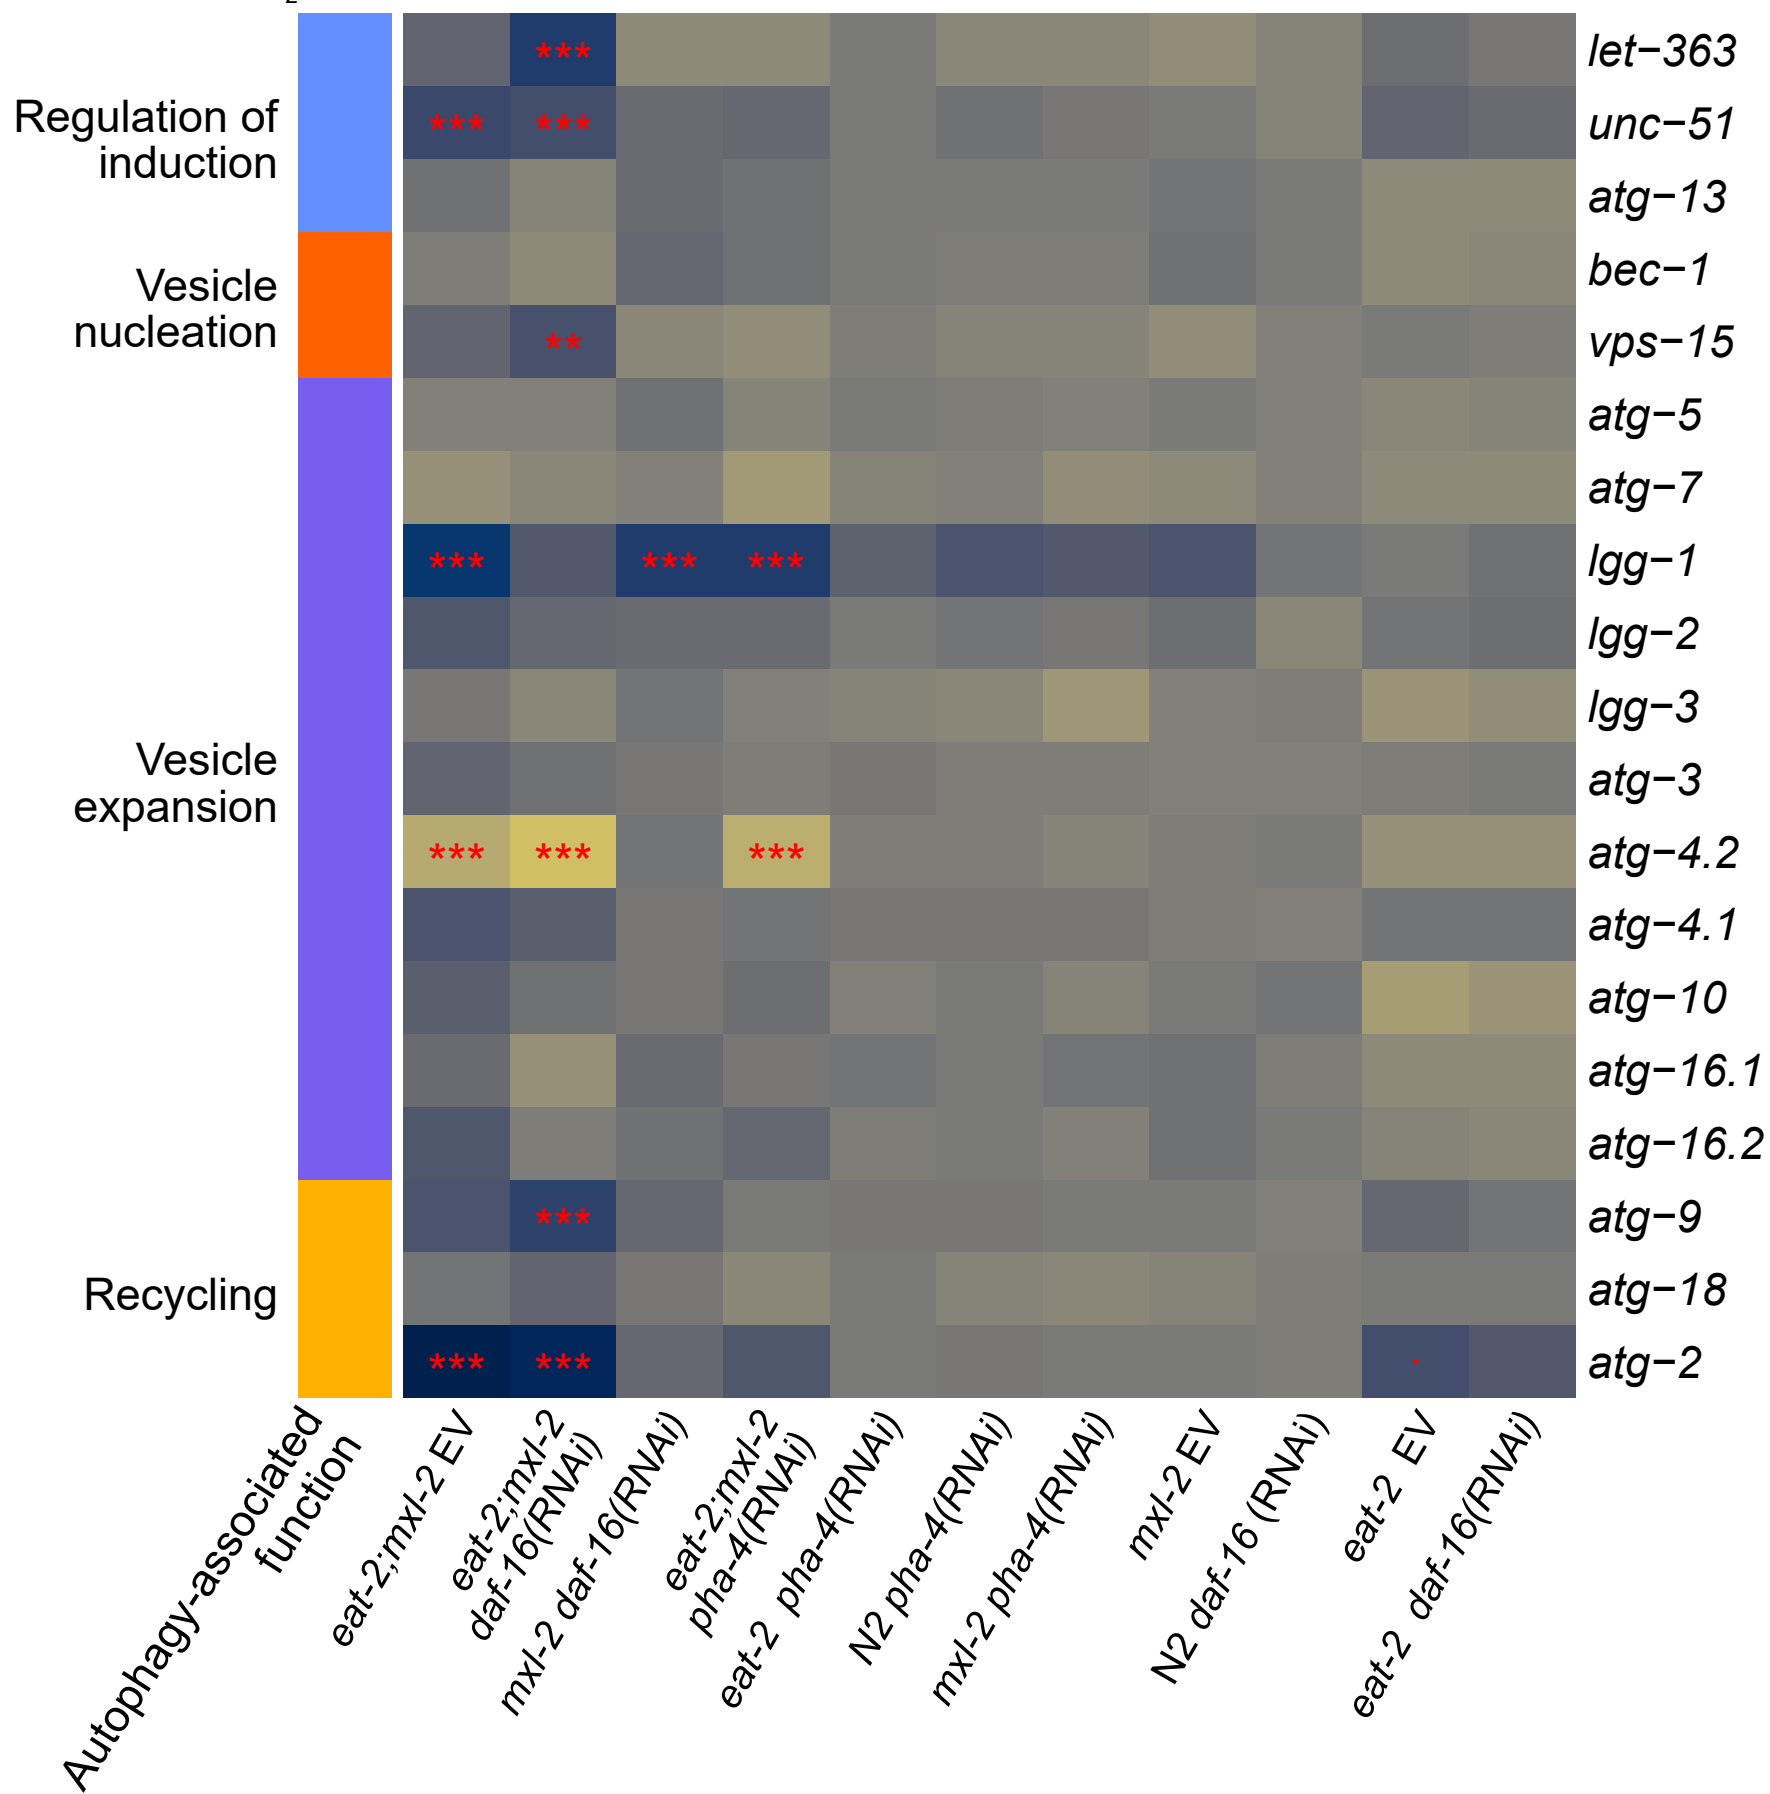

Supplement: 11357_2024_1197_MOESM7_ESM.pdf [file 11357_2024_1197_MOESM7_ESM.pdf]
